# Supplementary material for: Ultra-high throughput sequencing-based small RNA discovery and discrete statistical biomarker analysis in a collection of cervical tumours and matched controls
Source: PubMed Central journal article supplement (PMC2880020; doi:10.1186/1741-7007-8-58), 2010-05-11
Supplement: 1741-7007-8-58-S5.pdf [file 1741-7007-8-58-S5.pdf]

5q31.1
